# Supplementary material
Source: HighWire-hosted journal article supplement (https://jnm.snmjournals.org/highwire/filestream/94374/field_highwire_adjunct_files/0/111781_Supplemental_Data.pdf)
Supplement: 111781_Supplemental_Data.pdf [file 111781_Supplemental_Data.pdf]

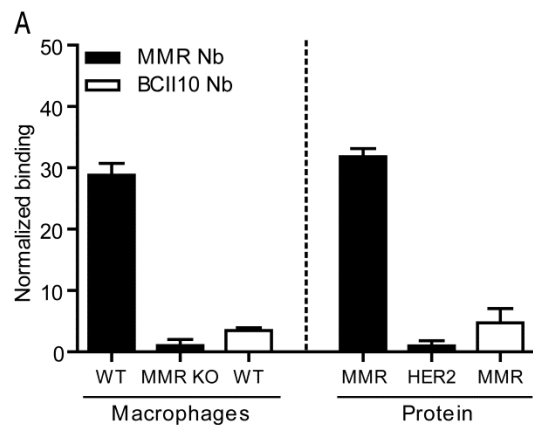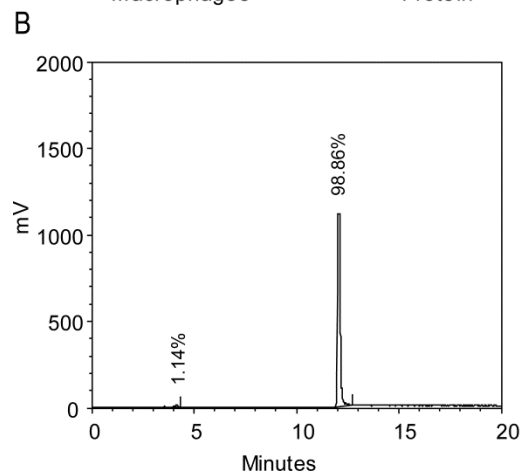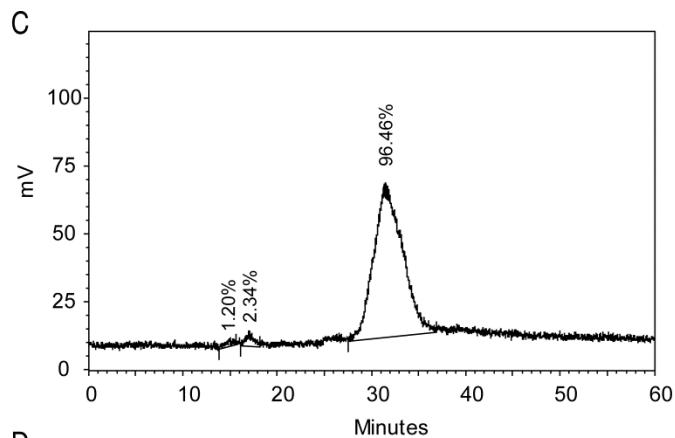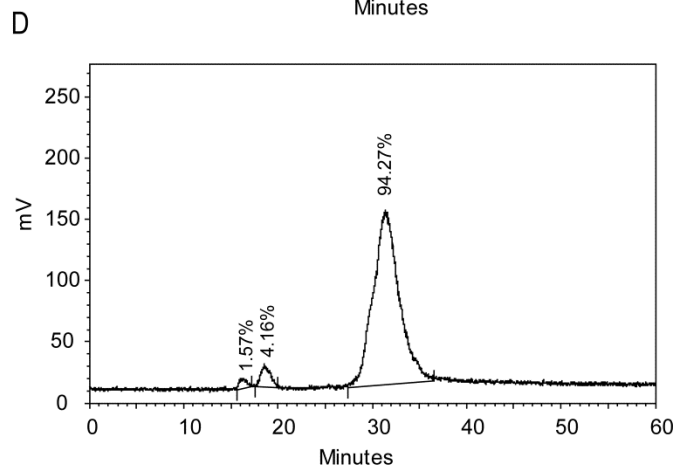

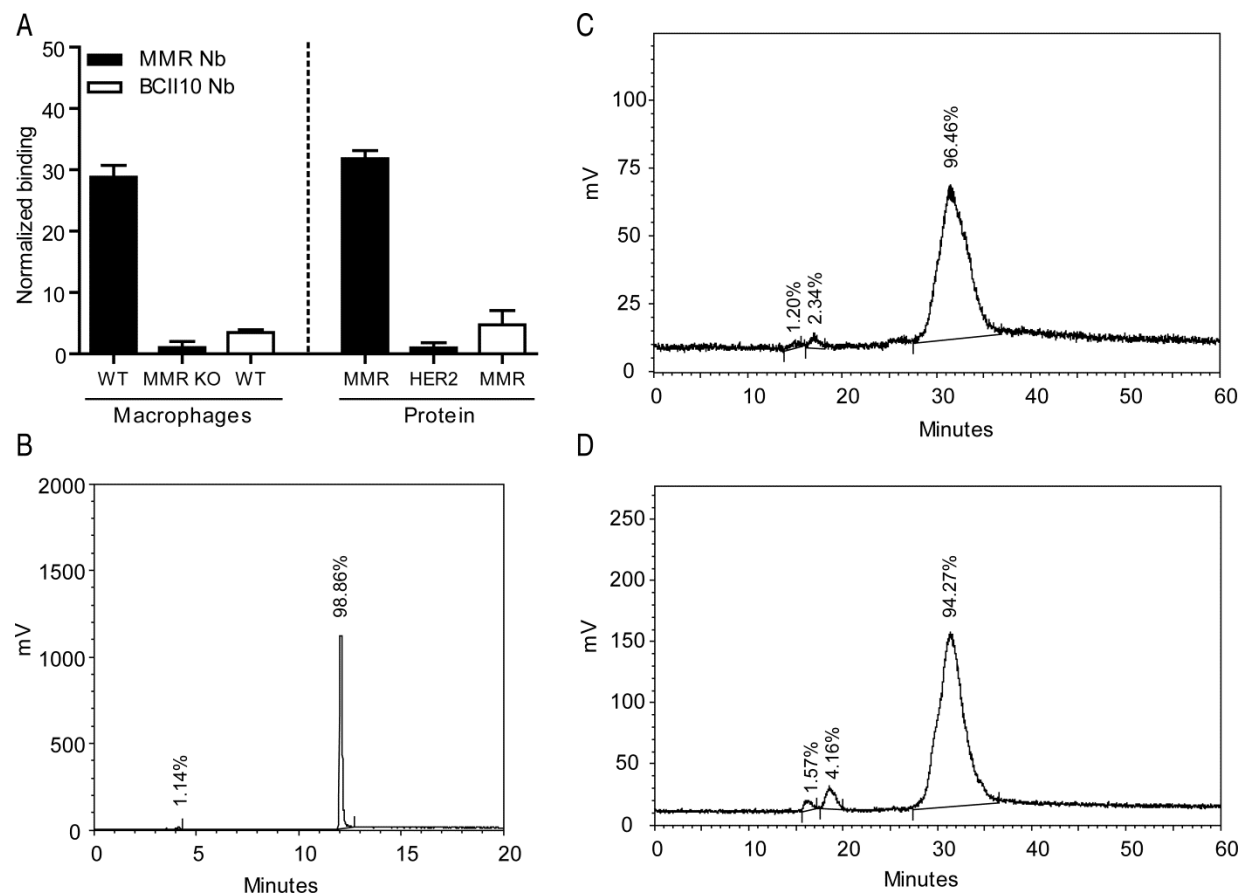

### Supplemental figure 1: Binding specificity, purity and stability of radiolabeled nanobodies.

**A:** *In vitro* binding specificity of  $^{99m}\text{Tc}$ -labeled nanobodies was investigated by quantification of the binding of the nanobodies (10 nM) to MMR-expressing peritoneal macrophages from wildtype mice and MMR knockout (KO) mice. Binding of the BCII10 nanobody to wildtype macrophages was included as a control. Binding of the MMR nanobodies to recombinant MMR or HER2 (control) protein further confirmed the specificity of the nanobodies. Graph shows mean of 3-4 normalized values +SEM.

**B:** Radiochemical purity was assessed by performing RP-HPLC on a PLRP-S column using a gradient of 75% 0.1% TFA in  $\text{H}_2\text{O}$  / 25% acetonitrile to 100% acetonitrile at 1 ml/min. The resulting radioactive signal shows a radiochemical purity of almost 99%.

**C:** Gel filtration of the  $^{99m}\text{Tc}$ -labeled nanobodies using a Superdex 75 column resulted in a peak of >96%.

**D:** Incubation of the radiolabeled nanobodies in mouse serum for three hours at  $37^\circ\text{C}$  (comparable to the *in vivo* situation) resulted in a similar profile as observed in panel C and confirmed the stability of the nanobodies.

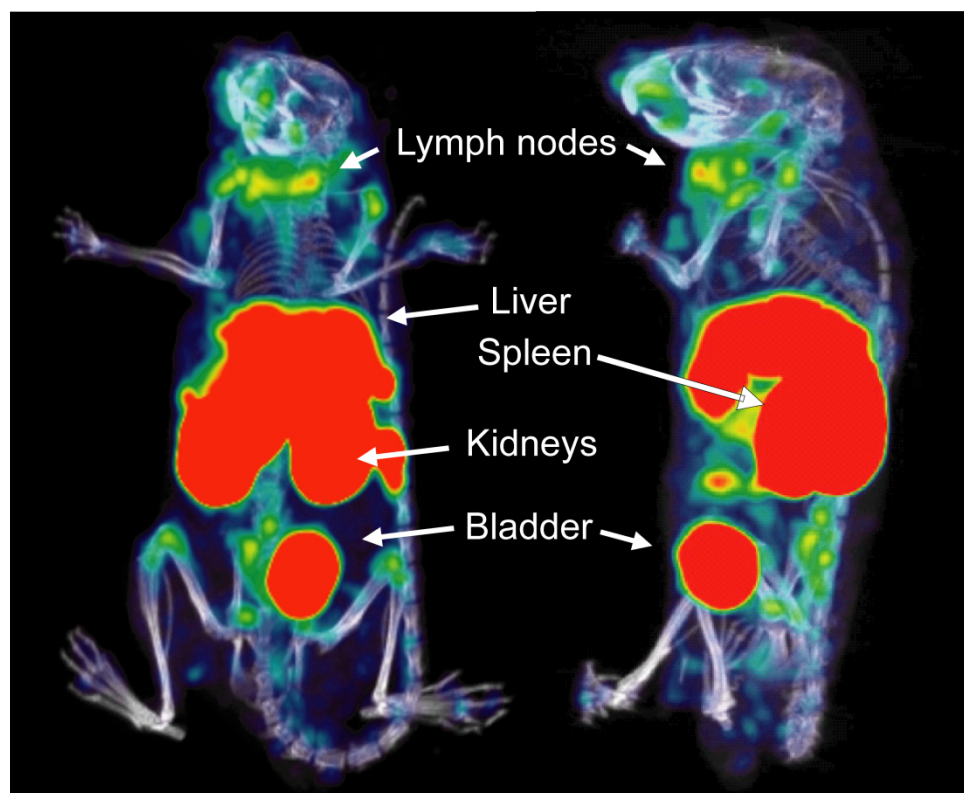

**Supplemental figure 2:** SPECT imaging was performed after micro-CT scans on healthy animals at 3 hours post injection and shows the biodistribution of injected MMR nanobody.

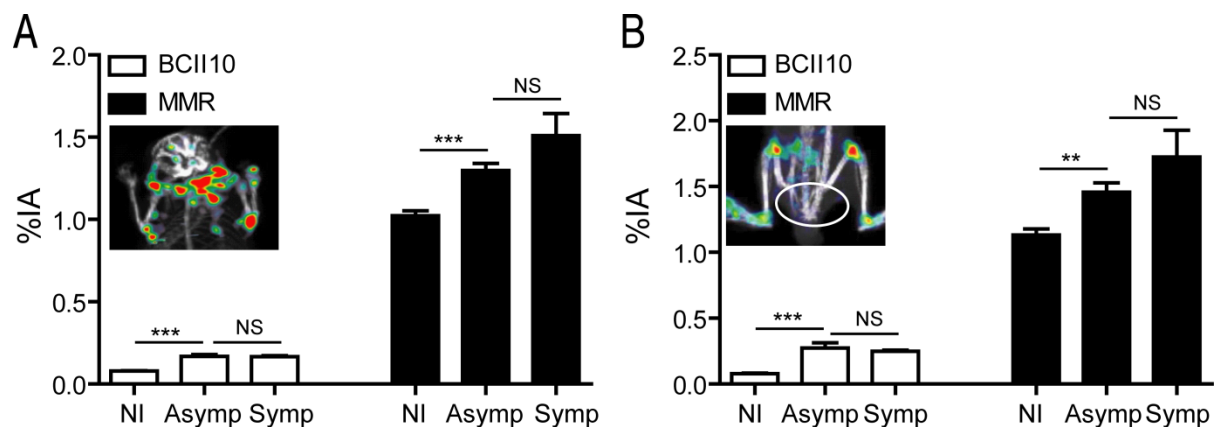

**Supplemental figure 3:** The radioactivity emitted by each area of interest [lymph nodes (A), immunization site (B)] was quantified using AMIDE software as % of injected activity (%IA) in groups of nonimmunized mice (NI), immunized mice without symptoms (Asymp) and with symptoms of arthritis (Symp). Inset images show quantified areas. Bars represent means of 6 to 12 values (NI: n=9; Asymp: n=6; Symp: n=12) + SEM (\*p<001 \*\*p<0 0001 Mann-Whitney's U test). NS: no significant difference.

**Supplemental table 1: Quantification of <sup>99m</sup>Tc-labeled BCII10 or MMR nanobody accumulation.**

|                          | BCII10   |         |               |         | MMR     |         |             |        |
|--------------------------|----------|---------|---------------|---------|---------|---------|-------------|--------|
|                          | NI       | Asymp   | Symp          |         | NI      | Asymp   | Symp        |        |
|                          |          |         | NA            | A       |         |         | NA          | A      |
| <b>Lymph nodes</b>       | 0.08 ±   | 0.17 ±  | 0.17 ± 0.007  |         | 1.02 ±  | 1.30 ±  | 1.51 ± 0.13 |        |
| <b>(%IA)</b>             | 0.003    | 0.011   |               |         | 0.030   | 0.044   |             |        |
| <b>Immunization site</b> | 0.08 ±   | 0.27 ±  | 0.25 ± 0.0078 |         | 1.13 ±  | 1.46 ±  | 1.73 ± 0.20 |        |
| <b>(%IA)</b>             | 0.005    | 0.039   |               |         | 0.046   | 0.071   |             |        |
| <b>Ankles (%IA)</b>      | 0.007 ±  | 0.021 ± | 0.018 ±       | 0.073 ± | 0.063 ± | 0.074 ± | 0.06 ±      | 0.36 ± |
|                          | 0.0008   | 0.002   | 0.002         | 0.007   | 0.003   | 0.004   | 0.003       | 0.03   |
| <b>Metatarsal joints</b> | 0.0028 ± | 0.013 ± | 0.0093 ±      | 0.038 ± | 0.062 ± | 0.05 ±  | 0.060 ±     | 0.20 ± |
|                          | 0.0005   | 0.001   | 0.002         | 0.004   | 0.003   | 0.003   | 0.004       | 0.03   |
| <b>Knees (%IA)</b>       | 0.016 ±  | 0.053 ± | 0.059 ±       | 0.087 ± | 0.30 ±  | 0.29 ±  | 0.35 ±      | 0.56 ± |
|                          | 0.0009   | 0.007   | 0.01          | 0.003   | 0.01    | 0.01    | 0.03        | 0.06   |
| <b>Dissected paws</b>    | 0.13 ±   | 0.40 ±  | 0.33 ±        | 0.70 ±  | 1.67 ±  | 1.88 ±  | 3.03 ±      | 4.83 ± |
|                          | 0.006    | 0.05    | 0.02          | 0.05    | 0.1     | 0.2     | 0.4         | 0.2    |

Table shows the mean values (%IA or %IA/g) obtained from the analysis shown in figure 5 ± SEM. Mice were divided into three groups. NI: non-immunized mice; Asymp: immunized mice without symptoms; Symp: immunized mice with symptoms of arthritis. Since collagen-induced arthritis is not a symmetric disease and limbs in the same mouse can have different scores, the ankles, metatarsal joints, knees and dissected paws of Symp mice were further subdivided in NA (non-arthritic, no scores) or A (arthritic, with scores).
